# Supplementary material for: Novel Insights on the Bacterial and Archaeal Diversity of the Panarea Shallow-Water Hydrothermal Vent Field
Source: MDPI journal article supplement (doi:10.3390/microorganisms11102464), 2023-09-30
Supplement: s1 [file s1]

Supplementary materials for

# **Novel insights on the bacterial and archaeal diversity of the Panarea shallow-water hydrothermal vent field**

**Erika Arcadi, Emanuela Buschi, Eugenio Rastelli, Michael Tangherlini, Pasquale De Luca, Valentina Esposito, Rosario Calogero, Franco Andaloro, Teresa Romeo, and Roberto Danovaro**

This file includes:

Supplementary Tables: **Table S1, Table S2**

Supplementary Figures: **Figure S1-S4.**

**Table S1.** Environmental characterization of the different sampling sites of Cold Vent, Hot Vent and Bottaro Crater Vent within the Panarea Shallow Hydrothermal system.

| Location            | Source samples  | Depth (m) | Temperature (°C) | pH   |
|---------------------|-----------------|-----------|------------------|------|
| Cold Vent           | Bottom seawater | 11        | 26.2             | 7.89 |
|                     | Sediment        | 11        | 26               | 5.91 |
| Hot Vent            | Bottom seawater | 11.4      | 25.39            | 8.07 |
|                     | Sediment        | 11.7      | 48               | 5.54 |
| Bottaro Crater Vent | Bottom seawater | 7.5       | 19.26            | 8.17 |
|                     | Sediment        | 7.5       | 28               | 6.78 |

**Table S2.** Outputs of the statistical analysis of the DISTLM marginal tests carried out on the dataset of the taxonomic composition of the prokaryotic assemblages at (a) ASV, (b) family and (c) class level in the seawater and sediment samples of the different vent sites.

| (a) Prokaryotes assemblages at ASV level |           |          |       |         |
|------------------------------------------|-----------|----------|-------|---------|
| Variable                                 | SS(trace) | Pseudo-F | P     | Prop.   |
| Temperature                              | 5895,7    | 1,5313   | 0,010 | 0,23446 |
| pH                                       | 8903,3    | 2,7407   | 0,021 | 0,35406 |

  

| (b) Prokaryotes assemblages at family level |           |          |       |         |
|---------------------------------------------|-----------|----------|-------|---------|
| Variable                                    | SS(trace) | Pseudo-F | P     | Prop.   |
| Temperature                                 | 2606,4    | 1,911    | 0,046 | 0,27652 |
| pH                                          | 6241,2    | 9,7983   | 0,025 | 0,66212 |

  

| (c) Prokaryotes assemblages at class level |           |          |       |         |
|--------------------------------------------|-----------|----------|-------|---------|
| Variable                                   | SS(trace) | Pseudo-F | P     | Prop.   |
| Temperature                                | 1213,3    | 1,9337   | 0,049 | 0,27888 |
| pH                                         | 2780      | 8,8496   | 0,032 | 0,63898 |

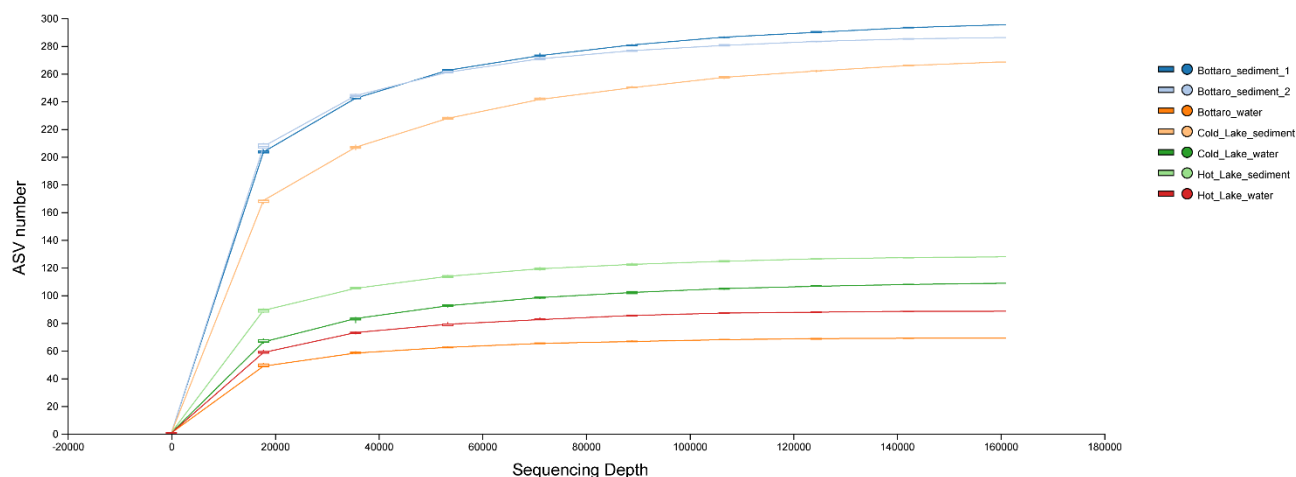

**Figure S1.** Rarefaction curves of the observed ASVs in the 3 different vent sites at increasing sequencing depth.

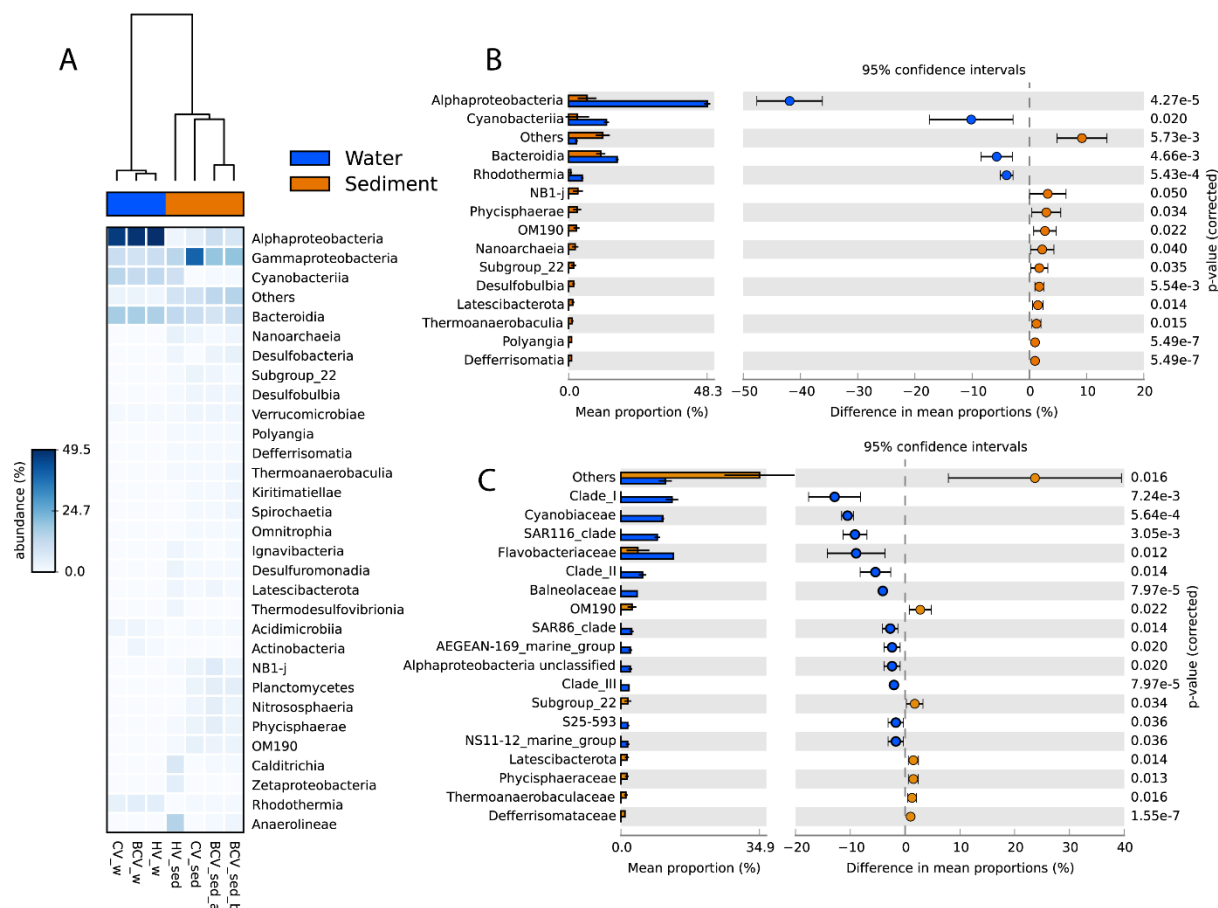

**Figure S2.** Taxonomic composition of the prokaryotic assemblages in water and sediment samples. Panel A shows a heatmap to highlight the clustering of the samples based on the relative abundance of the main prokaryotic classes identified; in panel B, the main prokaryotic classes responsible for the significant differences between water and sediment samples are shown; in panel C, higher resolution (at family level) analysis of the main prokaryotic taxa responsible for the significant differences between water and sediment samples.

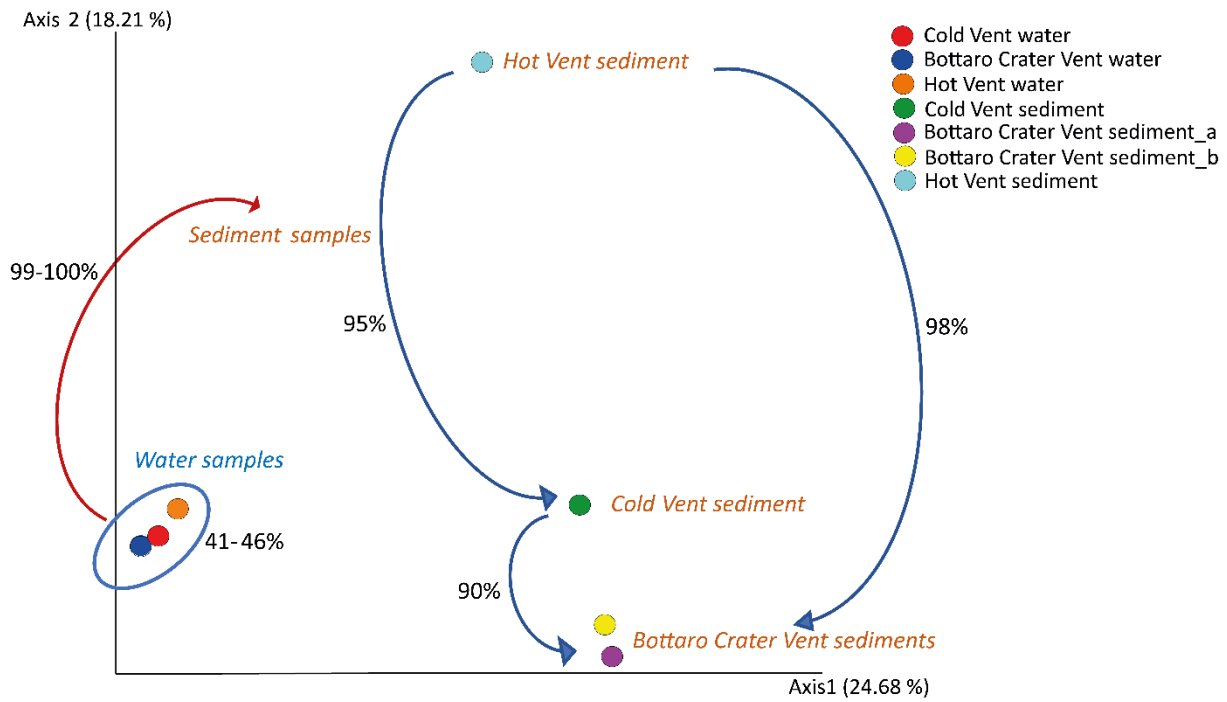

**Figure S3.** PCoA plot showing the turnover ( $\beta$ -)diversity in water and sediment samples of the three different vent sites. % values indicate the percent dissimilarity at ASV level among samples.

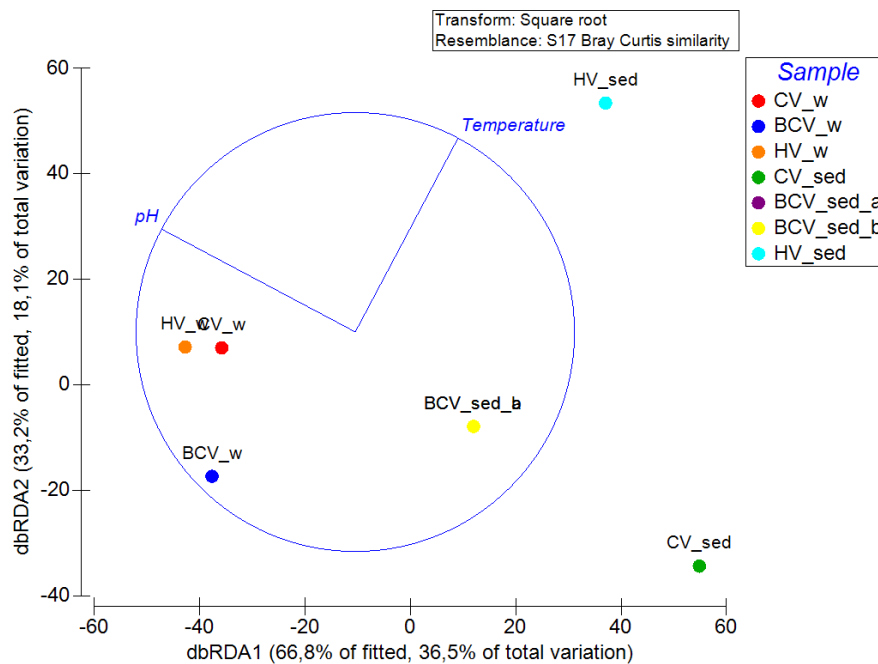

**Figure S4.** dbRDA showing the relationship between environmental variables and the taxonomic composition of prokaryotic assemblages (at family level) of the bottom waters and sediments of the three vent sites investigated.
